# Supplementary material for: DPD as an electron probe in ferrate oxidation: a novel spectrophotometric determination method and the fate of iron intermediates
Source: Royal Society of Chemistry journal article supplement (doi:10.1039/d5ew01007a), 2025-12-22
Supplement: d5ew01007a1.pdf [file d5ew01007a1.pdf]

## Supplementary Information

# **DPD as an electron probe in ferrate oxidation: A novel spectrophotometric determination method and the fate of iron intermediates**

Wen Qin<sup>a</sup>, Haoxin Shen<sup>a</sup>, Kai Li<sup>a</sup>, Yang Song<sup>a\*</sup>, Jin Jiang<sup>b\*</sup>, Jun Ma<sup>c</sup>

<sup>a</sup>School of Civil and Transportation Engineering, Guangdong University of Technology, Guangzhou 510006, Guangdong, China

<sup>b</sup> Guangdong Basic Research Center of Excellence for Ecological Security and Green Development, Key Laboratory for City Environmental Safety and Green Development of the Ministry of Education, School of Ecology, Environment and Resources, Guangdong University of Technology, Guangzhou, 510006, China

<sup>c</sup> State Key Laboratory of Urban Water Resource and Environment, School of Environment, Harbin Institute of Technology, Harbin 150090, China

\*Corresponding author:

songyang20@gdut.edu.cn (Yang Song) & jiangjin@gdut.edu.cn (Jin Jiang)

## Text S1 Chemicals and Reagents.

N,N-Diethyl-p-phenylenediamine sulfate salt (DPD, $\geq 98\%$ ) and 2,2'-azino-bis(3-ethylbenzothiazoline-6-sulfonate) (ABTS, $\geq 98\%$ ) were obtained from Sigma-Aldrich. Phosphoric acid ( $\text{H}_3\text{PO}_4$ , AR), disodium hydrogen phosphate ( $\text{Na}_2\text{HPO}_4$ , AR), monosodium phosphate ( $\text{NaH}_2\text{PO}_4$ , AR), acetic acid (HAC, AR), sodium acetate ( $\text{NaAC}$ , AR), Magnesium chloride ( $\text{MgCl}_2$ , AR), calcium chloride ( $\text{CaCl}_2$ , AR), ammonium chloride ( $\text{NH}_4\text{Cl}$ , AR), Sodium pyrophosphate ( $\text{Na}_4\text{P}_2\text{O}_7$ , AR), sodium bicarbonate ( $\text{NaHCO}_3$ , AR), sodium tetraborate ( $\text{Na}_2\text{B}_4\text{O}_7$ , AR), sodium hypochlorite ( $\text{NaClO}$ , contains available chlorine  $> 5\%$ ), hydrogen peroxide solution ( $\text{H}_2\text{O}_2$ , purity 30%), horseradish peroxidase, (HRP, RZ:  $> 3.0$  and activity:  $> 300$  units/mg) and phenol (AR) were obtained from Aladdin Reagents Co., Ltd. (Shanghai, China).

Phosphate buffer in the stocks solution of ferrate was used as a buffering system to maintain pH, as well as a chelating agent for Fe(III) to prevent the precipitation of its hydroxide compounds that could interfere with spectrophotometric analysis, and as a stabilizer to inhibit the self-decomposition of Fe(VI). The concentration of Fe(VI) in the stock solution decreased by less than 1% within 5 minutes after preparation. All prepared Fe(VI) stock solutions were typically used within 10 minutes after preparation without any significant decomposition. However, this standardization technique was not able to accurately determine the Fe(VI) concentration below  $10\mu\text{M}$ , which required the use of appropriate dilution factors to obtain the desired concentration. The working solutions of Fe(VI) were prepared by diluting the stock solution with a  $5\text{mM Na}_2\text{HPO}_4$  /  $1\text{mM Na}_2\text{B}_4\text{O}_7$  buffer, which made them more stable than the stock solution, with a decrease of less than 1% within 10 minutes.

## Text S2 Analytical Methods.

The formation  $\text{H}_2\text{O}_2$  were determined after the reaction of DPD with Fe(VI) in the 300mM phosphate buffer (pH=6).  $\text{H}_2\text{O}_2$  was quantified by the horseradish peroxidase (HRP)-catalyzed oxidation of DPD to  $\text{DPD}^{\bullet+}$  by  $\text{H}_2\text{O}_2$  ( $\text{H}_2\text{O}_2 + 2\text{DPD} \rightarrow 2\text{DPD}^{\bullet+}$ , the HRP-DPD method). Use of the HRP/DPD method to determine  $\text{H}_2\text{O}_2$  formation from the Fe(VI)-DPD reaction is advantageous because the system already contains residual DPD after the completion of the ferrate(VI)-DPD reaction. Accordingly, 50  $\mu\text{L}$  of the HRP stock solution (1 mg  $\text{mL}^{-1}$ ) was added into 5 mL of a solution where the Fe(VI)-DPD reaction was completed. The increase of the absorbance at 551 nm ( $\Delta A_{551}$ ) was measured 1 min after the addition of HRP.

The formation final iron oxidation state (Fe(III) vs. Fe(II)) were determined after the reaction of DPD with ferrate(VI). 0.5 mL of a bipyridine (BPY) stock solution (5 mM) was added to the reaction solution (5 mL). BPY forms a complex with Fe(II) that has a maximum absorption at 552 nm ( $\epsilon = 8650 \text{ M}^{-1} \text{ cm}^{-1}$ ) [1]. The absorbance change at 510 nm indicating that Fe(III) not Fe(II) is the final product from the Fe(VI)-DPD reaction.

Text S3 Experimental procedure for the stoichiometric coefficient between the reaction Fe(VI) of DPD.

Experiments were conducted by adding a constant amount (1.0 mL) of Fe(VI) stock solution (250.0  $\mu$ M) into varied concentrations of DPD solutions (49.0 mL), where the range of  $[\text{DPD}]_0 / [\text{Fe (VI)}]_0$  is 0.1~500. Formation of  $\text{DPD}^{\bullet+}$  was monitored at 551 nm and consumption of DPD was determined at 240 nm with UV-visible spectrophotometry (UV-9000, SHANGHAI METASH INSTRUMENTS CO., LTD, China).

Text S4 Experimental procedure for the determination of the reaction rate constant between Fe(VI) and phenol.

The rate constant of the reaction between Fe(VI) (15  $\mu\text{M}$ ) and phenol was determined under pseudo first-order conditions in excess of phenol (0.15 mM) by using a dispenser system (DispensMate, Dragon Laboratory Instruments Limited, China) and an UV-Vis spectrophotometer. 2 mL of sample solution was withdrawn with a dispenser at specific time intervals into a 3 mL of solution containing phosphate buffer and DPD reagent where the remaining Fe(VI) leads to a coloration of the solution. After 30 s, the solution was transferred into a 1 cm quartz cell to measure the absorbance at 551 nm. The residual concentration of Fe(VI) was then calculated.

Text S5 Experimental procedure for investigate the oxidative capacity of ferrate under buffer solutions.

The formation of  $\text{DPD}^{\bullet+}$  was studied in 300mM carbonate, 300mM borate, 300mM phosphate and 30mM pyrophosphate buffers, respectively. All solutions were at pH 7.2. Experiments were performed by adding different concentrations of Fe(VI) working solutions (2 mL) to constant concentration DPD solutions (3 mL). The DPD solutions (5 mM) were prepared in the above different types of buffer solutions with NaOH and  $\text{H}_2\text{SO}_4$  to make sure the pH maintained at 7.2. The Fe(VI) solutions (120  $\mu\text{M}$ ) were prepared in 1 mM  $\text{Na}_2\text{B}_4\text{O}_7$  buffer (pH=9.2), then Fe(VI) working solution (15~120  $\mu\text{M}$ ) was obtained by diluting. Formation of  $\text{DPD}^{\bullet+}$  was monitored at 551 nm.

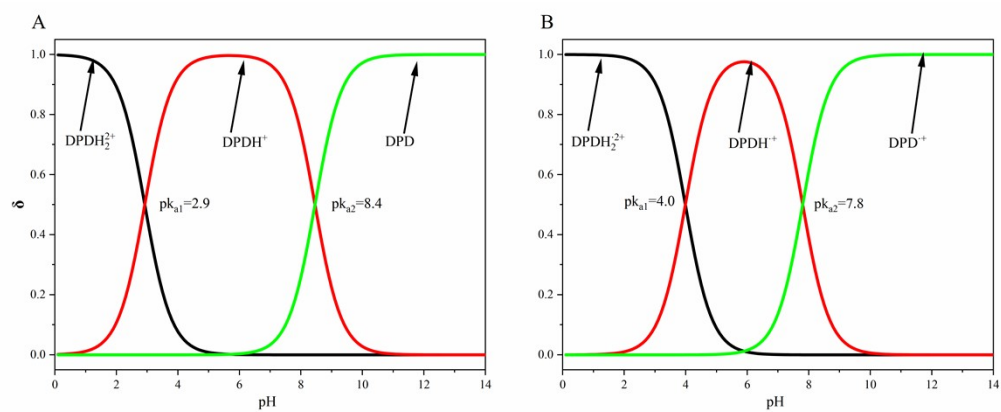

Fig. S1 The morphological distribution of the DPD (A) and  $\text{DPD}^{\bullet+}$  (B) species at different pH. [2]

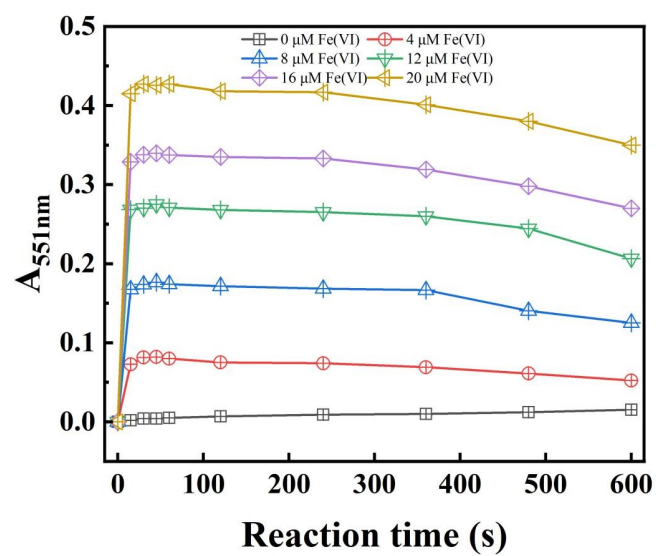

Fig. S2 Effect of reaction time on the absorbance of the formed  $\text{DPD}^{*+}$  measured at 551 nm within 10 min.

Experimental conditions:  $[\text{Fe(VI)}]_0 = 0\sim 20\ \mu\text{M}$ ,  $\text{pH} = 6$  (300 mM phosphate buffer),  $[\text{DPD}]_0 = 15\ \text{mM}$ , reaction time = 10 min.



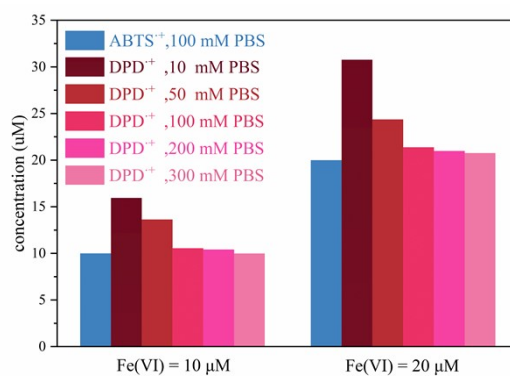

Fig. S3 Effect of buffer concentration solution for  $\text{DPD}^{*+}$  generated after the oxidation of DPD with Fe(VI).

Experimental conditions:  $\text{pH} = 6$ ,  $[\text{DPD}]_0 = 5 \text{ mM}$ ,  $[\text{Fe(VI)}]_0 = 0 \sim 20 \text{ } \mu\text{M}$ , reaction time = 30 s. Where,  $[\text{ABTS}]_0 = 30 \text{ } \mu\text{M}$ , 100mM phosphate buffer ( $\text{pH} = 7$ ).

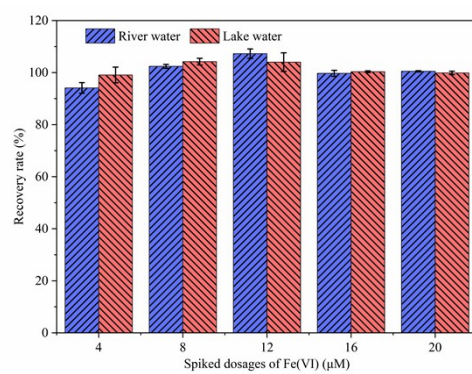

Fig. S4 Recovery test of DPD method with various spiked dosages of Fe(VI).

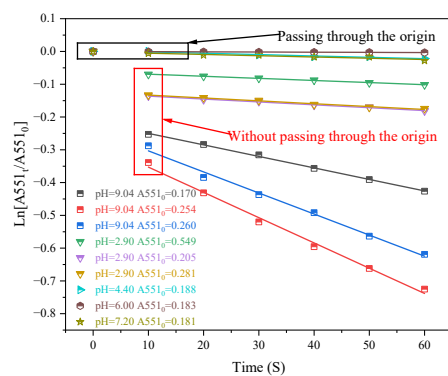

Fig. S5 Stability of DPD at different pH values.

Experimental conditions: pH =2.90、4.40、6.00、7.20、9.04 (100 mM phosphate buffer).

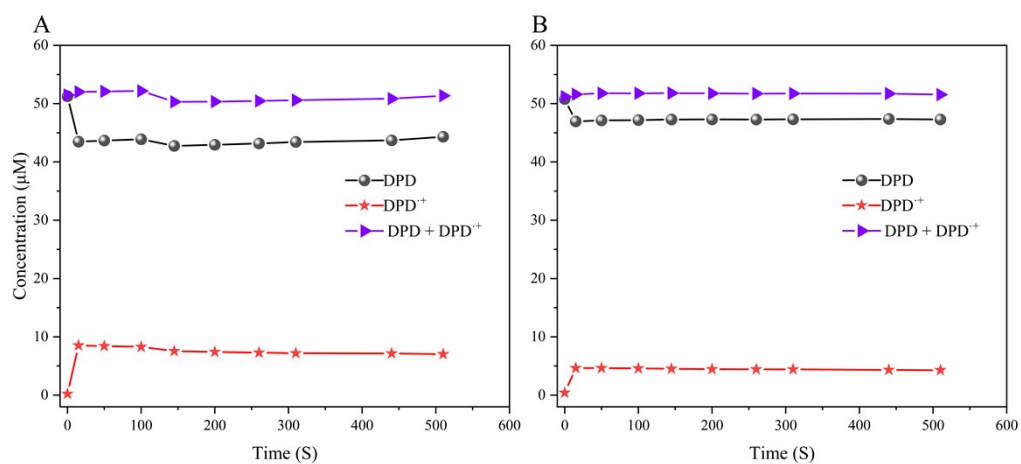

Fig. S6 Evolution of DPD, DPD<sup>•+</sup> and DPD + DPD<sup>•+</sup> in the reaction of DPD with Fe(VI) at PH 6.

Experimental conditions: [DPD]<sub>0</sub> = 50 μM, [Fe (VI)]<sub>0</sub> = 20 for (A), 10 for (B) μM, pH = 6 (200 mM phosphate buffer).

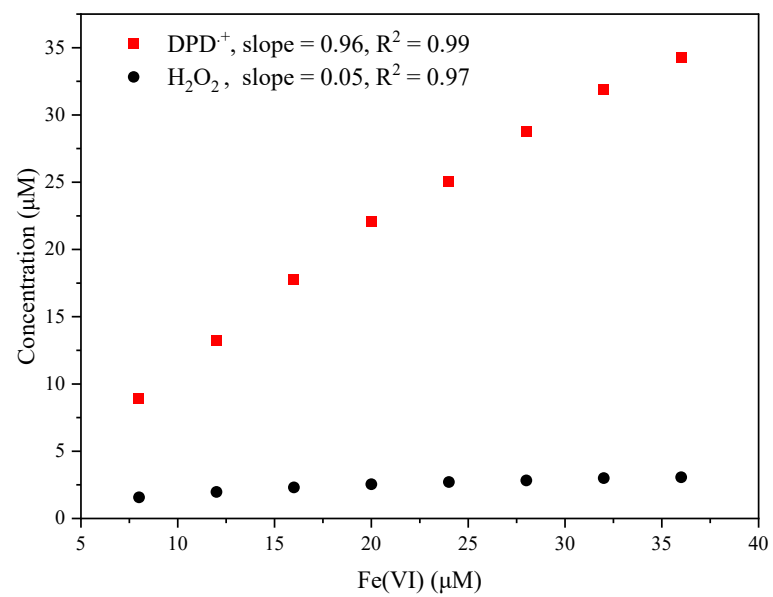

Fig. S7 Formation of  $\text{DPD}^{+}$  and  $\text{H}_2\text{O}_2$  were measured for each  $\text{Fe(VI)}$  dose after complete consumption of  $\text{Fe(VI)}$ .

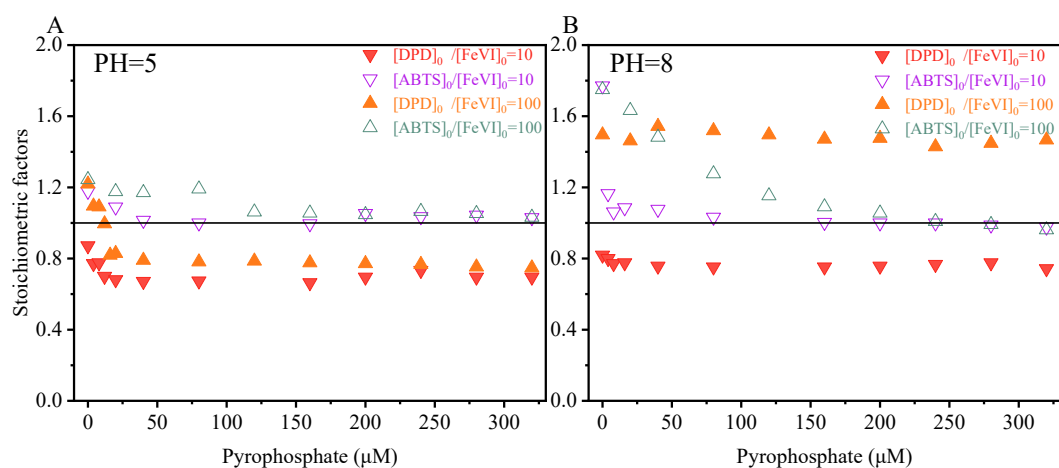

Fig. S8 Influence of pyrophosphate on the production of  $\text{DPD}^{\bullet+}$  /  $\text{ABTS}^{\bullet+}$  at  $\text{DPD/ABTS}$  oxidized by  $\text{Fe(VI)}$ .

Experimental conditions:  $[\text{Fe(VI)}]_0 = 10 \mu\text{M}$ ,  $[\text{DPD}]_0 = 0.1$  or  $1 \text{ mM}$ ,  $[\text{pyrophosphate}]_0 = 0 \sim 360 \mu\text{M}$ ,  $\text{pH} = (\text{A})$  for 5 (300mM acetate buffer) and  $(\text{B})$  for 8 (10mM borate buffer).

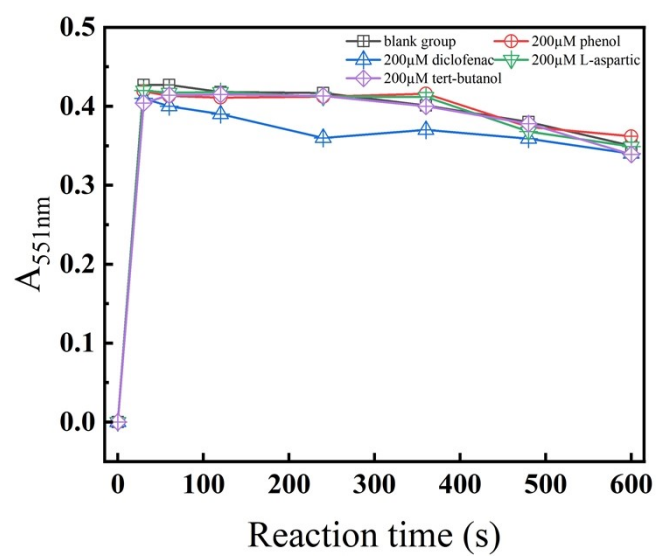

Fig. S9 Effect of phenol, diclofenac, L-aspartic acid, and tert-butanol on the absorbance of the formed  $\text{DPD}^{*+}$  measured at 551 nm.

Experimental conditions:  $[\text{Fe(VI)}]_0 = 20 \mu\text{M}$ ,  $\text{pH} = 6$  (300 mM phosphate buffer),  $[\text{DPD}]_0 = 15 \text{ mM}$ , reaction time = 10 min,  $[\text{phenol}]_0 = [\text{diclofenac}]_0 = [\text{L-aspartic acid}]_0 = [\text{tert-butanol}]_0 = 200 \mu\text{M}$ .

Table S1 Chemical properties and structures.

|                                      | Formula                                        | Mol.<br>Weight | pKa                                            | Structure                                                                           |
|--------------------------------------|------------------------------------------------|----------------|------------------------------------------------|-------------------------------------------------------------------------------------|
| N,N-Diethyl-p-phenylenediamine (DPD) | C <sub>10</sub> H <sub>16</sub> N <sub>2</sub> | 164.24         | pKa <sub>1</sub> =2.9<br>pKa <sub>2</sub> =8.4 | 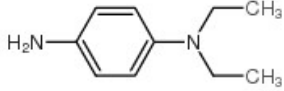 |



Table S2 Water quality parameters of Pearl river water and Lake water.

| Water parameters | pH  | UV254 | DOC (mg C/L) | Alkalinity (mg/L) |
|------------------|-----|-------|--------------|-------------------|
| River water      | 6.5 | 0.107 | 3.49         | 5.61              |
| Lake water       | 7.8 | 0.176 | 4.7          | 3.59              |

Table S3 Original data of calibration curves in natural water.

| [Fe(VI)]/ $\mu$ M                 |                       | 0 | 4          | 8          | 12         | 16         | 20         | Slope      | R <sup>2</sup> |
|-----------------------------------|-----------------------|---|------------|------------|------------|------------|------------|------------|----------------|
| River<br>water<br>at<br>551<br>nm | Trial1                | 0 | 0.078      | 0.170      | 0.276      | 0.338      | 0.417      | 0.021<br>2 | 0.995<br>6     |
|                                   | Trial2                | 0 | 0.075      | 0.167      | 0.260      | 0.332      | 0.428      | 0.021<br>4 | 0.997<br>0     |
|                                   | Trial3                | 0 | 0.078      | 0.169      | 0.264      | 0.327      | 0.415      | 0.020<br>8 | 0.999<br>1     |
|                                   | Trial4                | 0 | 0.074      | 0.170      | 0.265      | 0.327      | 0.403      | 0.020<br>5 | 0.999<br>2     |
|                                   | Trial5                | 0 | 0.079      | 0.170      | 0.266      | 0.328      | 0.416      | 0.020<br>9 | 0.999<br>2     |
|                                   | Trial6                | 0 | 0.079      | 0.171      | 0.266      | 0.328      | 0.432      | 0.021<br>5 | 0.999<br>1     |
|                                   | Average               | 0 | 0.077      | 0.169      | 0.267      | 0.332      | 0.420      | 0.021<br>2 | 0.999<br>0     |
|                                   | Standard<br>Deviation | 0 | 0.002<br>1 | 0.001<br>2 | 0.004<br>9 | 0.003<br>8 | 0.009<br>3 | 0.000<br>4 |                |
| [Fe(VI)]/ $\mu$ M                 |                       | 0 | 4          | 8          | 12         | 16         | 20         | Slope      | R <sup>2</sup> |
| Lake<br>water<br>at<br>551<br>nm  | Trial1                | 0 | 0.084      | 0.176      | 0.274      | 0.339      | 0.423      | 0.021<br>3 | 0.997<br>5     |
|                                   | Trial2                | 0 | 0.080      | 0.172      | 0.270      | 0.336      | 0.438      | 0.021<br>8 | 0.998<br>6     |
|                                   | Trial3                | 0 | 0.080      | 0.173      | 0.267      | 0.338      | 0.420      | 0.021<br>2 | 0.998<br>7     |
|                                   | Trial4                | 0 | 0.082      | 0.177      | 0.264      | 0.336      | 0.445      | 0.022<br>0 | 0.997<br>1     |
|                                   | Trial5                | 0 | 0.082      | 0.178      | 0.266      | 0.336      | 0.421      | 0.021<br>1 | 0.997<br>7     |
|                                   | Trial6                | 0 | 0.088      | 0.176      | 0.269      | 0.337      | 0.446      | 0.021<br>9 | 0.997<br>7     |
|                                   | Average               | 0 | 0.081      | 0.174      | 0.270      | 0.338      | 0.427      | 0.021<br>4 | 0.998<br>3     |
|                                   | Standard<br>Deviation | 0 | 0.002<br>8 | 0.002<br>2 | 0.003<br>2 | 0.001<br>2 | 0.011<br>2 | 0.000<br>4 |                |

Table S4 Original data of LOD and LOQ calculation.

The LOD and LOQ are expressed by the following equations [3]:

$$\text{LOD} = \frac{3\sigma}{K_s} \quad \text{\textbackslash* MERGEFORMAT (1)}$$

$$\text{LOQ} = \frac{10\sigma}{k_s} \quad \text{\textbackslash* MERGEFORMAT (2)}$$

where  $\sigma$  is the standard deviation (SD) of the absorbance values obtained from 20 blank samples at the detected wavelength;  $K_s$  indicates the slope of the calibration curves.

| Item                                                                   | Ultrapure water at 551 nm | Ultrapure water at 510 nm |
|------------------------------------------------------------------------|---------------------------|---------------------------|
| Absorbance of blank samples                                            | 0.013                     | 0.004                     |
|                                                                        | 0.008                     | 0.007                     |
|                                                                        | 0.008                     | 0.014                     |
|                                                                        | 0.007                     | 0.012                     |
|                                                                        | 0.008                     | 0.014                     |
|                                                                        | 0.003                     | 0.014                     |
|                                                                        | 0.005                     | 0.010                     |
|                                                                        | 0.012                     | 0.005                     |
|                                                                        | 0.008                     | 0.012                     |
|                                                                        | 0.009                     | 0.013                     |
|                                                                        | 0.014                     | 0.004                     |
|                                                                        | 0.007                     | 0.015                     |
|                                                                        | 0.013                     | 0.014                     |
|                                                                        | 0.014                     | 0.016                     |
|                                                                        | 0.014                     | 0.006                     |
|                                                                        | 0.006                     | 0.016                     |
|                                                                        | 0.008                     | 0.014                     |
|                                                                        | 0.009                     | 0.014                     |
|                                                                        | 0.012                     | 0.016                     |
|                                                                        | 0.006                     | 0.014                     |
| Standard deviation ( $\sigma$ )                                        | 0.0032                    | 0.0040                    |
| Slope of calibration curve ( $k_s$ ) ( $\text{M}^{-1}\text{cm}^{-1}$ ) | 20700                     | 19900                     |
| LOD ( $\mu\text{M}$ )                                                  | 0.47                      | 0.61                      |
| LOQ ( $\mu\text{M}$ )                                                  | 1.57                      | 2.03                      |

Table S5 Original data of the recovery test for the determination of Fe(VI) using DPD method in real water samples.

| Sample Name                                      |         | River water at 551 nm |        |        |       |        |
|--------------------------------------------------|---------|-----------------------|--------|--------|-------|--------|
| Fe(VI)/ $\mu\text{M}$                            |         | 4.00                  | 8.00   | 12.00  | 16.00 | 20.00  |
| Detected concentration ( $\mu\text{M}$ )         | Trial 1 | 3.77                  | 8.22   | 13.33  | 16.30 | 20.13  |
|                                                  | Trial 2 | 3.62                  | 8.08   | 12.54  | 16.03 | 20.18  |
|                                                  | Trial 3 | 3.76                  | 8.18   | 12.77  | 15.79 | 20.04  |
|                                                  | Trial 4 | 3.80                  | 8.21   | 12.82  | 15.81 | 20.06  |
|                                                  | Trial 5 | 3.82                  | 8.24   | 12.86  | 15.83 | 20.07  |
|                                                  | Trial 6 | 3.86                  | 8.27   | 12.89  | 15.87 | 20.11  |
|                                                  | Trial 7 | 3.72                  | 8.16   | 12.88  | 16.04 | 20.12  |
| Average detected concentration ( $\mu\text{M}$ ) |         | 3.76                  | 8.19   | 12.87  | 15.95 | 20.10  |
| Standard deviation                               |         | 0.08                  | 0.06   | 0.24   | 0.18  | 0.05   |
| Average recovery rate                            |         | 94.10                 | 102.42 | 107.26 | 99.71 | 100.50 |
| relative standard deviation                      |         | %                     | %      | %      | %     | %      |
|                                                  |         | 2.04%                 | 0.75%  | 1.83%  | 1.16% | 0.24%  |

  

| Sample Name                                      |         | Lake water at 551 nm |        |        |        |       |
|--------------------------------------------------|---------|----------------------|--------|--------|--------|-------|
| Fe(VI)/ $\mu\text{M}$                            |         | 4.00                 | 8.00   | 12.00  | 16.00  | 20.00 |
| Detected concentration ( $\mu\text{M}$ )         | Trial 1 | 4.00                 | 8.38   | 12.03  | 16.15  | 20.16 |
|                                                  | Trial 2 | 4.00                 | 8.19   | 12.67  | 16.00  | 19.95 |
|                                                  | Trial 3 | 3.81                 | 8.24   | 12.57  | 16.10  | 20.00 |
|                                                  | Trial 4 | 3.90                 | 8.43   | 12.81  | 16.00  | 19.76 |
|                                                  | Trial 5 | 3.90                 | 8.48   | 13.05  | 16.00  | 20.05 |
|                                                  | Trial 6 | 4.19                 | 8.38   | 12.48  | 16.05  | 19.86 |
|                                                  | Trial 7 | 3.94                 | 8.27   | 11.76  | 16.08  | 20.04 |
| Average detected concentration ( $\mu\text{M}$ ) |         | 3.96                 | 8.34   | 12.48  | 16.05  | 19.97 |
| Standard deviation                               |         | 0.12                 | 0.11   | 0.45   | 0.06   | 0.13  |
| Average recovery rate                            |         | 99.08                | 104.21 | 104.00 | 100.33 | 99.87 |
| relative standard deviation                      |         | %                    | %      | %      | %      | %     |
|                                                  |         | 3.01%                | 1.27%  | 3.58%  | 0.36%  | 0.66% |

Table S6 The recovery test of DPD method and ABTS method for Fe(VI) determination with different interference ions.

| Sample Name                                     |         | DPD method |       |       | ABTS method |       |       |
|-------------------------------------------------|---------|------------|-------|-------|-------------|-------|-------|
| Fe(VI):Ca(II)                                   | □       | 1:10       | 1:50  | 1:100 | 1:10        | 1:50  | 1:100 |
| Detected concentration<br>( $\mu\text{M}$ )     | Trial 1 | 20.29      | 18.81 | 17.62 | 20.21       | 18.76 | 14    |
|                                                 | Tria l2 | 19.62      | 18.52 | 15.52 | 17.29       | 16.76 | 15.12 |
|                                                 | Trial 3 | 20.75      | 19.03 | 17.39 | 19.41       | 18.33 | 14.64 |
|                                                 | Trial 4 | 20.76      | 19.10 | 16.70 | 18.97       | 17.61 | 15.70 |
|                                                 | Trial 5 | 21.19      | 19.98 | 17.20 | 19.66       | 18.09 | 15.20 |
|                                                 | Trial 6 | 21.97      | 19.93 | 16.96 | 19.58       | 18.00 | 16.10 |
|                                                 | Trial 7 | 21.89      | 19.97 | 17.64 | 19.93       | 18.41 | 15.80 |
| Average detected concentration( $\mu\text{M}$ ) |         | 20.92      | 19.33 | 17.00 | 19.29       | 18.00 | 15.22 |
| Standard deviation                              |         | 0.84       | 0.61  | 0.74  | 0.97        | 0.65  | 0.73  |
| Average recovery rate                           |         | 104.6<br>2 | 96.67 | 85.02 | 96.46       | 89.98 | 76.11 |
| relative standard deviation                     |         | 4.02       | 3.18  | 4.34  | 5.00        | 3.63  | 4.79  |
| Fe(VI):Mg(II)                                   | □       | 1:10       | 1:50  | 1:100 | 1:10        | 1:50  | 1:100 |
| Detected concentration<br>( $\mu\text{M}$ )     | Trial 1 | 20.71      | 20.14 | 19.57 | 21.41       | 20.44 | 20.18 |
|                                                 | Tria l2 | 20.19      | 19.14 | 18.95 | 20.4        | 21.58 | 20.32 |
|                                                 | Trial 3 | 20.72      | 19.84 | 19.50 | 21.34       | 21.08 | 20.43 |
|                                                 | Trial 4 | 20.65      | 19.63 | 20.20 | 21.86       | 21.54 | 20.88 |

|                                                 |                             |         |            |            |       |            |            |        |
|-------------------------------------------------|-----------------------------|---------|------------|------------|-------|------------|------------|--------|
|                                                 |                             | Trial 5 | 21.30      | 20.12      | 20.15 | 22.31      | 21.97      | 21.60  |
|                                                 |                             | Trial 6 | 21.61      | 20.55      | 20.44 | 22.19      | 21.89      | 21.39  |
|                                                 |                             | Trial 7 | 21.98      | 20.51      | 20.38 | 22.94      | 22.23      | 22.39  |
| Average detected concentration( $\mu\text{M}$ ) |                             |         | 21.02      | 19.99      | 19.88 | 21.78      | 21.53      | 21.03  |
| Standard deviation                              |                             |         | 0.63       | 0.50       | 0.55  | 0.82       | 0.61       | 0.81   |
| Average recovery rate                           |                             |         | 105.1<br>1 | 99.95      | 99.41 | 108.9<br>0 | 107.6<br>6 | 105.14 |
|                                                 | relative standard deviation |         | 2.98       | 2.50       | 2.79  | 3.77       | 2.82       | 3.85   |
| Fe(VI): $\text{NH}_4^+$                         |                             |         | 1:10       | 1:50       | 1:100 | 1:10       | 1:50       | 1:100  |
| Detected concentration ( $\mu\text{M}$ )        | Trial 1                     |         | 21.9       | 19.1       | 17.29 | 21.68      | 20.15      | 16.03  |
|                                                 | Tria 12                     |         | 19.86      | 17.9       | 14.81 | 20.09      | 22.03      | 20.09  |
|                                                 | Trial 3                     |         | 21.67      | 20.95      | 20.67 | 22.5       | 20.46      | 18.53  |
|                                                 | Trial 4                     |         | 21.77      | 19.90      | 18.22 | 22.34      | 21.86      | 19.04  |
|                                                 | Trial 5                     |         | 21.22      | 19.99      | 18.64 | 22.27      | 22.41      | 19.79  |
|                                                 | Trial 6                     |         | 22.30      | 21.23      | 19.86 | 22.41      | 22.05      | 19.40  |
|                                                 | Trial 7                     |         | 22.35      | 21.31      | 19.57 | 22.39      | 22.95      | 19.57  |
| Average detected concentration( $\mu\text{M}$ ) |                             |         | 21.58      | 20.05      | 18.44 | 21.96      | 21.70      | 18.92  |
| Standard deviation                              |                             |         | 0.85       | 1.25       | 1.95  | 0.87       | 1.02       | 1.37   |
| Average recovery rate                           |                             |         | 107.9<br>1 | 100.2<br>7 | 92.19 | 109.7<br>8 | 108.5<br>2 | 94.61  |
|                                                 | relative standard           |         | 3.95       | 6.22       | 10.58 | 3.95       | 4.72       | 7.26   |

|  |           |  |  |  |  |  |  |  |
|--|-----------|--|--|--|--|--|--|--|
|  | deviation |  |  |  |  |  |  |  |
|--|-----------|--|--|--|--|--|--|--|

Table S7 The recovery of Fe(VI) determined by DPD method under different interfering ions with concentrations closer to natural water.

| Fe(VI):Interfering Ion or<br>Humic Acid Concentration | Recovery of DPD Method (%) |
|-------------------------------------------------------|----------------------------|
| Fe(VI):Ca <sup>2+</sup> =1:5                          | 98.7±2.1                   |
| Fe(VI):NH <sub>4</sub> <sup>+</sup> =1:1              | 101.3±1.8                  |
| Fe(VI):Na <sup>+</sup> =1:5                           | 97.2±2.3                   |
| Fe(VI):K <sup>+</sup> =1:5                            | 95.8±2.5                   |
| Fe(VI):Fe <sup>3+</sup> =1:0.05                       | 102.5±1.6                  |
| Fe(VI):Cu <sup>2+</sup> =1:0.05                       | 99.1±2                     |
| Fe(VI):Cl <sup>-</sup> =1:50                          | 96.5±2.4                   |
| Fe(VI):SO <sub>4</sub> <sup>2-</sup> =1:50            | 100.5±1.2                  |
| Fe(VI):HCO <sub>3</sub> <sup>-</sup> =1:50            | 99.8±1.5                   |
| [Humic Acid] =0mg/L                                   | 100.2±1.7                  |
| [Humic Acid] =1mg/L                                   | 99.7±1.5                   |
| [Humic Acid] =5mg/L                                   | 95.3±2.5                   |



## References in SI

- [1] B.M. Voelker, F.M.M. Morel, B. Sulzberger, Iron Redox Cycling in Surface Waters: Effects of Humic Substances and Light, *Environmental Science & Technology*, 31 (1997) 1004-1011.
- [2] H.E. Moore, M.J. Garmendia, W.J. Cooper, Kinetics of monochloramine oxidation of N,N-diethyl-p-phenylenediamine, *Environmental science & technology*, 18 (1984) 348-353.
- [3] J. Uhrovčík, Strategy for determination of LOD and LOQ values – Some basic aspects, *Talanta*, 119 (2014) 178-180.
